# Supplementary material
Source: PubMed Central journal article supplement (PMC6347430)
Supplement: NIHMS1517605-supplement-1.pdf [file NIHMS1517605-supplement-1.pdf]

**Cell Reports, Volume 25**

## **Supplemental Information**

### **Paired Related Homeobox Protein 1 Regulates Quiescence in Human Oligodendrocyte Progenitors**

**Jing Wang, Darpan Saraswat, Anjali K. Sinha, Jessie Polanco, Karen Dietz, Melanie A. O'Bara, Suyog U. Pol, Hani J. Shayya, and Fraser J. Sim**

## Supplemental Figures

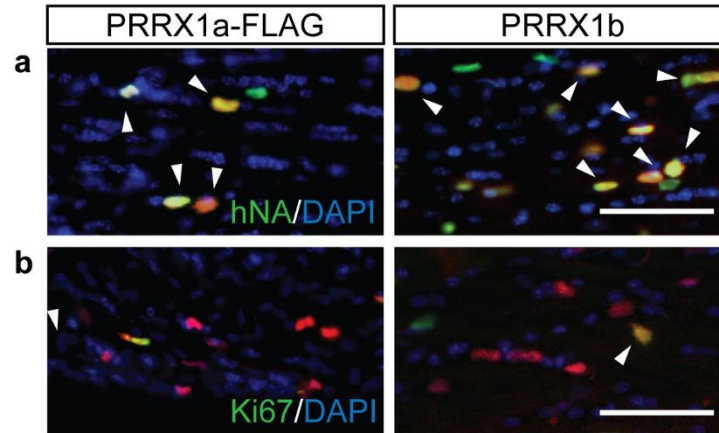

**Figure S1 (related to Figure 3). PRRX1 over-expression was maintained for 12 weeks in engrafted human cells *in vivo*.** Engrafted fetal human oligodendrocyte progenitors infected with PRRX1a or PRRX1b LV were examined after 12 weeks. **a**, PRRX1 expression was readily apparent in the majority of human (hNA; green) cells with antibodies recognizing the flag tag in the PRRX1a variant or specific to the PRRX1b variant (both in red). **b**, Proliferation of PRRX1 expressing engrafted cells was also confirmed by observing Ki67-PRRX1 double-positive cells. Arrowheads indicate double-positive cells. Scale: 50  $\mu$ m.

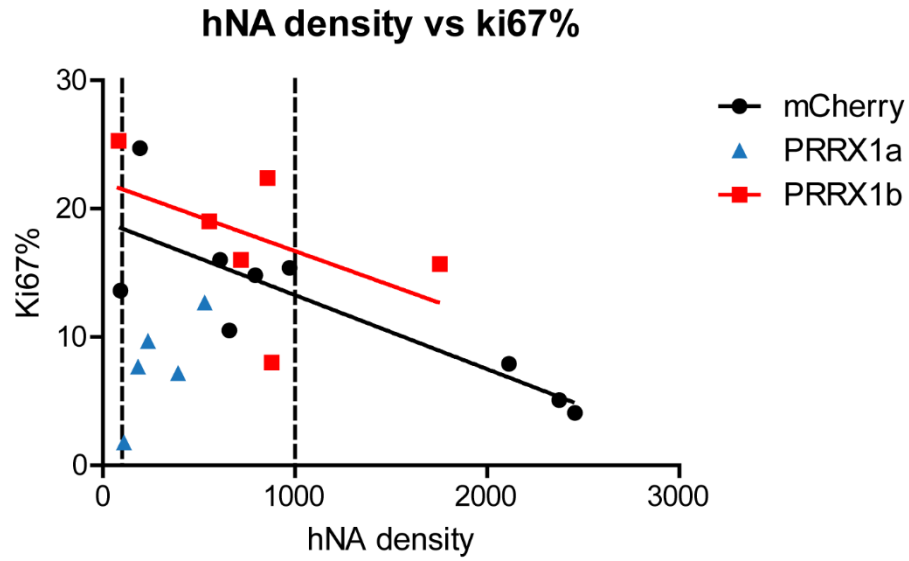

**Figure S2 (related to Figure 3). Proliferation of human oligodendrocyte progenitors varies with density *in vivo*.** Mice were sacrificed 12 wk following implantation of fetal human oligodendrocyte progenitors infected with a control mCherry lentivirus. Dashed lines demarcate range of densities used for Ki67 analysis. The density of implanted cells was calculated in regions within corpus callosum and plotted against the percentage of cells positive for Ki67 by immunohistochemistry (n = 9;  $r^2 = 0.70$ ,  $p < 0.01$ , Pearson's correlation).

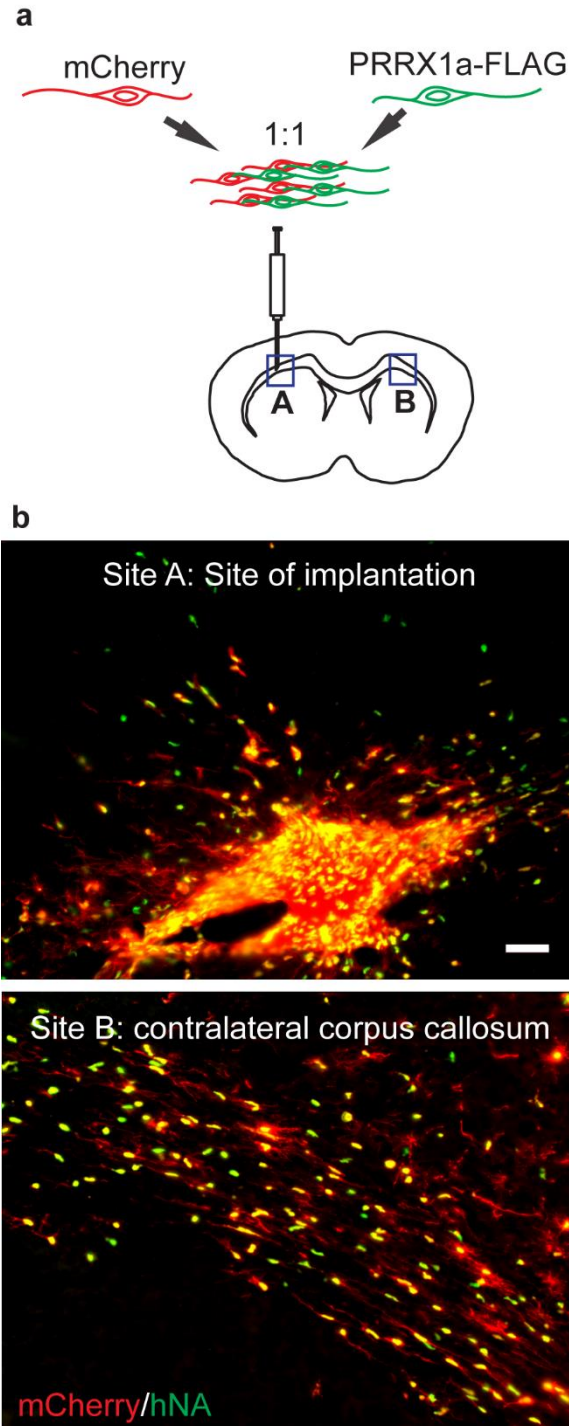

**Figure S3 (related to Figure 3). Selective advantage of control hOPCs versus PRRX1-expressing quiescent hOPCs in *shiverer* forebrain.** **a**, control mCherry-infected hOPCs were mixed 1:1 with PRRX1a-FLAG-infected hOPCs prior to unilateral engraftment into the corpus callosum of postnatal day 2-3 *shiverer/rag2* mice ( $n = 3$ ). Mice were sacrificed at 4 wk to assess migration and engraftment of each population. **b**, the distribution of mCherry<sup>+</sup>hNA<sup>+</sup> and FLAG<sup>+</sup>hNA<sup>+</sup> cells was assessed at the site of implantation (A) and in the contralateral corpus callosum (B). The vast majority of hNA<sup>+</sup> cells (green) co-expressed mCherry (red). In contrast to transplanted PRRX1a-FLAG<sup>+</sup> cells at 12 weeks (**Figure S1**), no FLAG<sup>+</sup> cells were detected at either site, indicating that PRRX1-infected hOPCs failed to successfully engraft. Scale: 50  $\mu$ m.

**a**

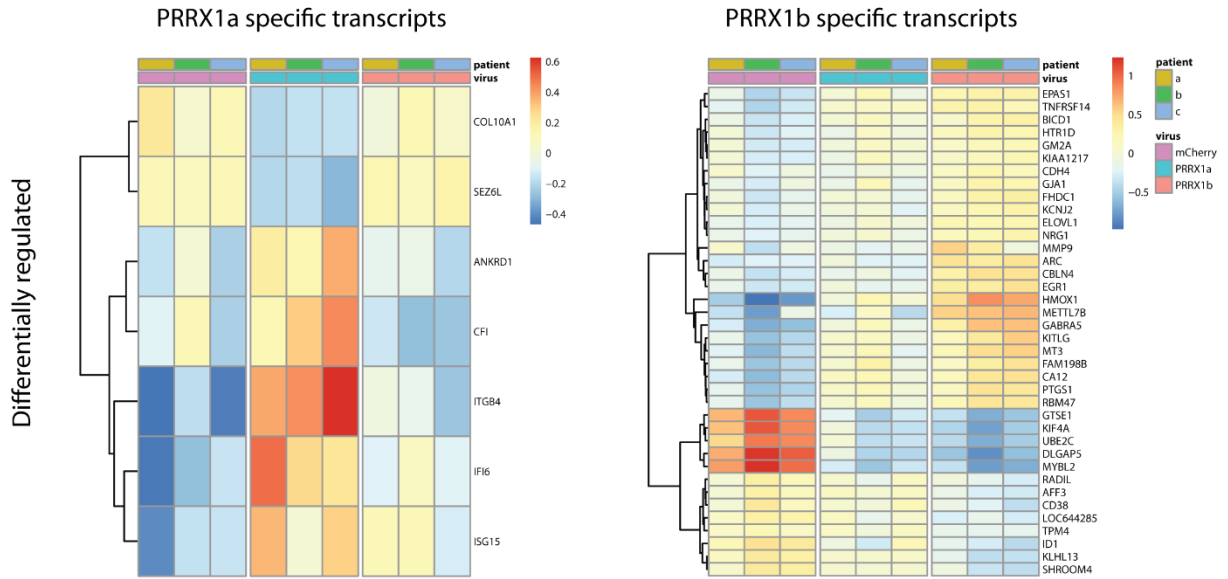

**b**

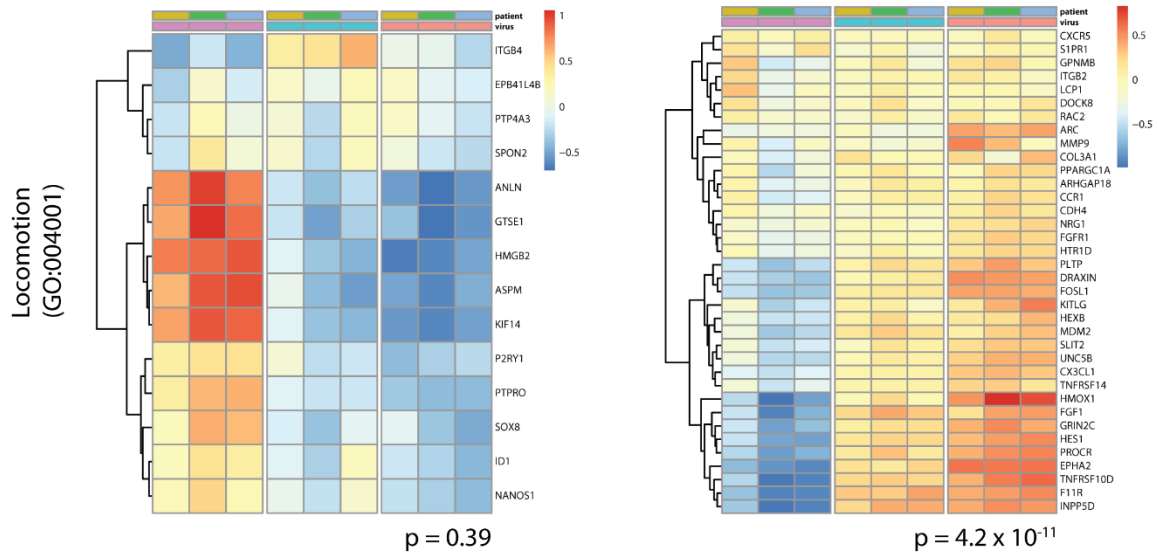

**c**

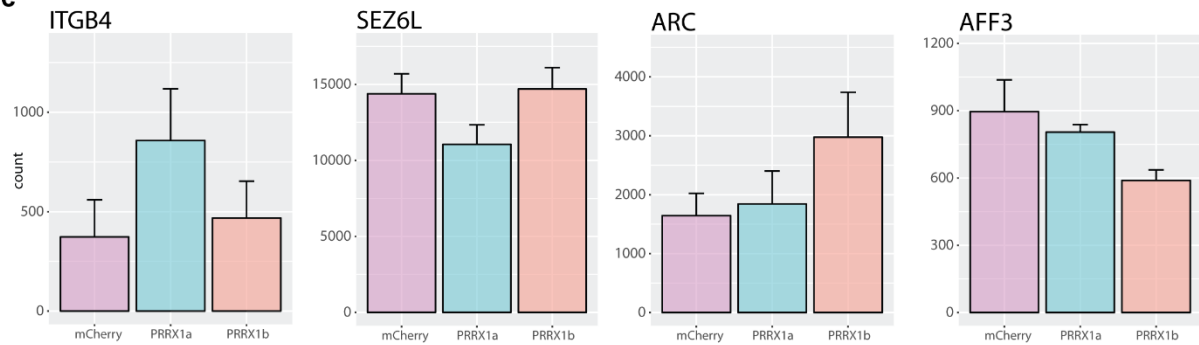

**Figure S4 (related for Figure 5). Analysis of splice-specific effects of PRRX1 over-expression on hOPCs.** To better identify transcripts regulated by PRRX1 in a splice-specific manner, we used a modified linear model in which PRRX1 transcript level was used as an additional covariate. The PRRX1a and PRRX1b-infected hOPC transcriptomes were then compared by *edgeR* analysis and pathway analysis. **a**, Differential expressed transcripts between PRRX1a and PRRX1b ( $q < 0.1$ ) were further filtered to include only those regulated significantly vs. mCherry-infected OPCs ( $q < 0.05$ ). 7 genes were specifically regulated by PRRX1a and 38 genes by PRRX1b. Heatmaps show relative expression of *vst* normalized counts for each gene to the median level across samples (log2 scale shown). **b**, *topGO* analysis of transcripts regulated between 1a and 1b ( $q < 0.1$ ) revealed that locomotion (GO:004001) were among the top 5 pathways up-regulated by 1b ( $p = 4.2 \times 10^{-11}$ ). **c**, selected genes plotted based on normalized counts (pseudocount of 0.5; mean  $\pm$  SEM,  $n = 3$ ). All genes were significantly regulated between PRRX1a and PRRX1b conditions.

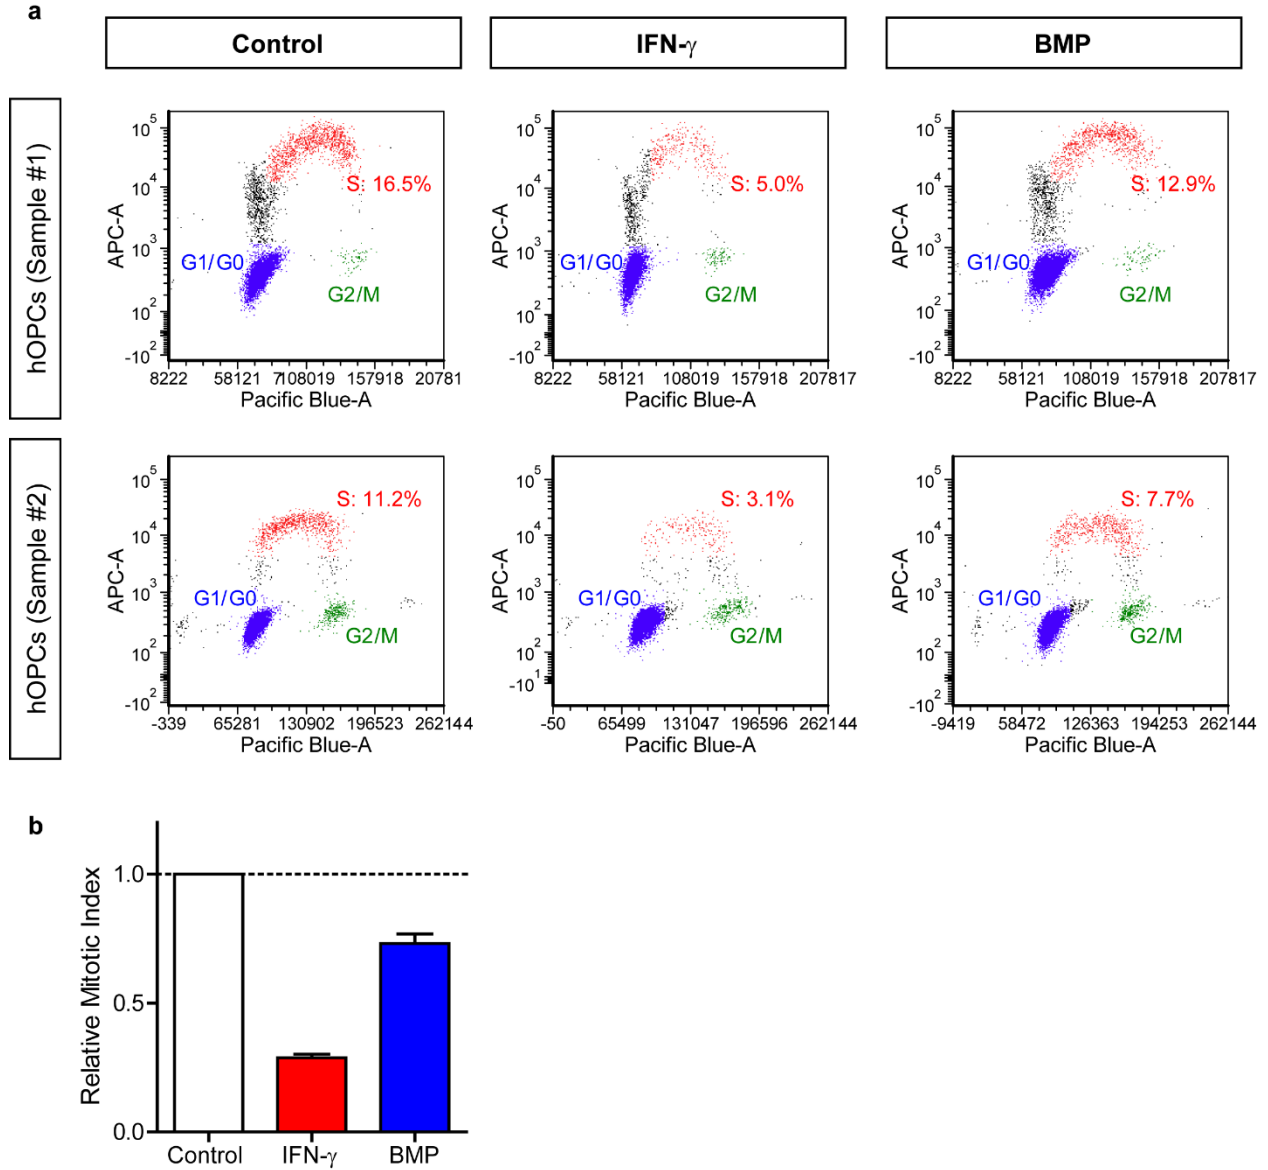

**Figure S5 (related to Figure 6). IFN- $\gamma$  and BMP reduce hOPC proliferation.** **a**, hOPCs were grown in SFM without PDGF-AA (Control) or following addition of IFN- $\gamma$  (10 ng/ml) or BMP-7 (50 ng/ml) for 24 hrs. Flow cytometry of S phase entry (red; 2-h EdU incorporation) and G<sub>1/0</sub> and G<sub>2/M</sub> phases (blue and green, respectively). Both IFN- $\gamma$  and BMP7 treatment substantially reduced the proportion of S-phase hOPCs. The same number of events are shown in each dot plot following gating for singlet discrimination. **b**, quantification of mitotic index (defined as % S-phase relative to control cells) (mean  $\pm$  SEM, n = 2 fetal human samples).

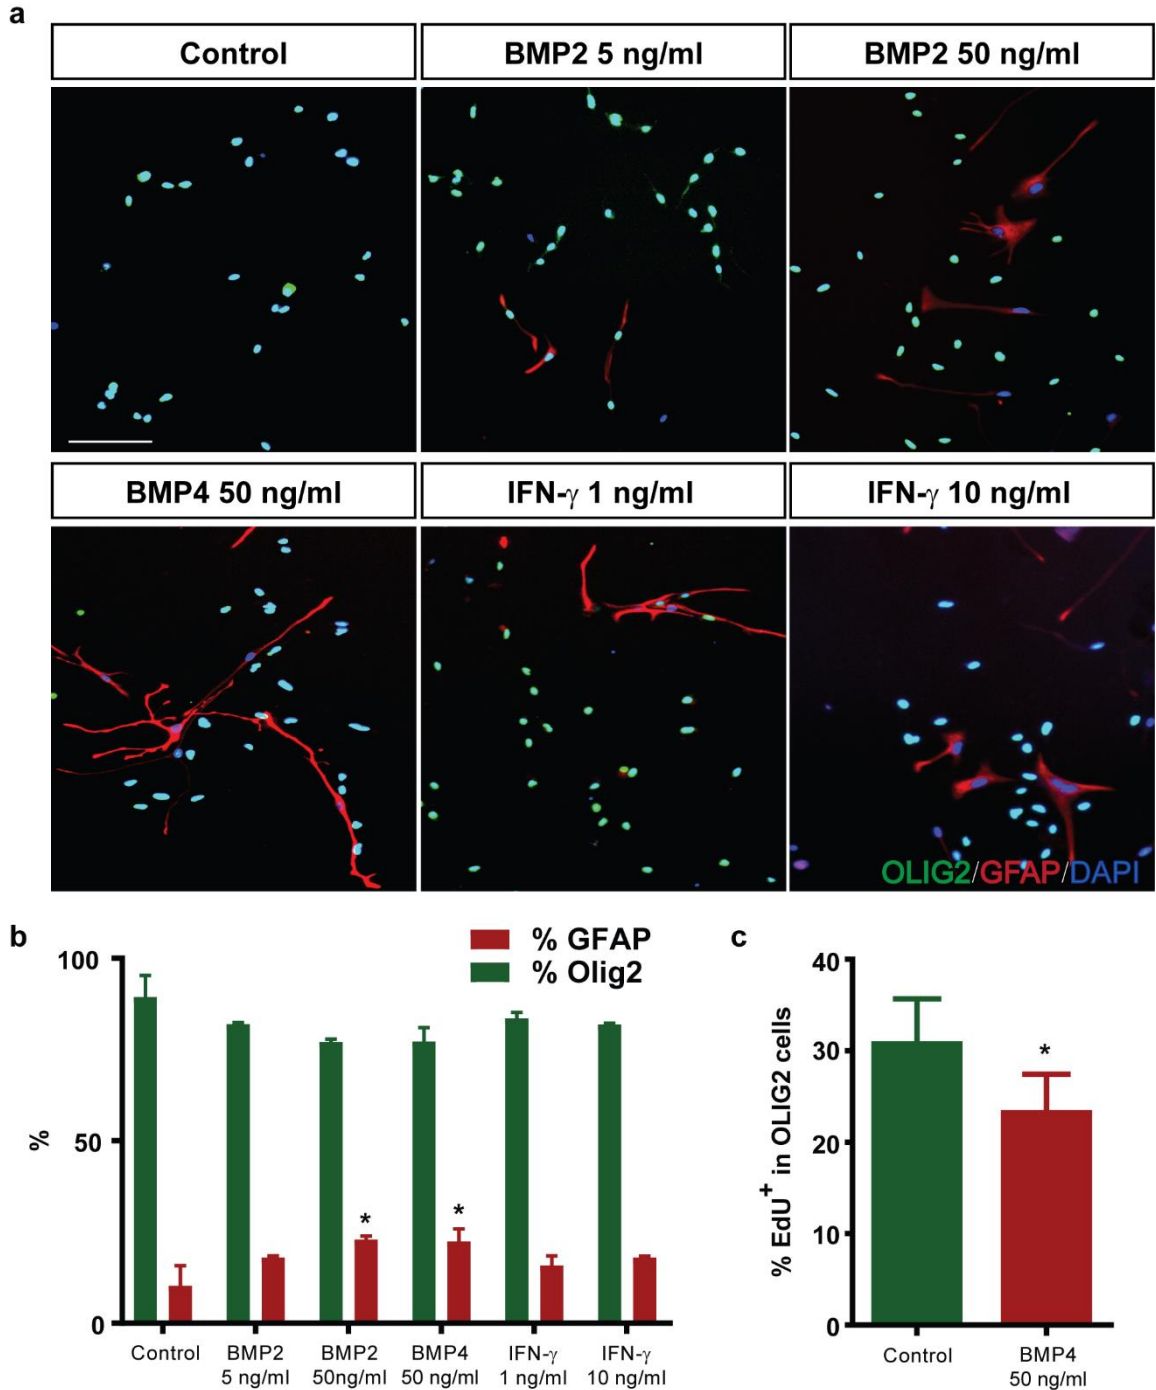

**Figure S6 (related to Figure 6). Effect of BMP2/4 and IFN- $\gamma$  on hOPC lineage and astrocyte differentiation. a,** hOPC were treated with BMP2 (5-50 ng/ml), BMP4 (50ng/ml), or IFN- $\gamma$  (1-10 ng/ml) for 24 hours. The effect of cytokine treatment on oligodendrocyte lineage commitment (OLIG2, green) and astrocyte fate (GFAP, red) was assessed by immunocytochemistry. **b,** Quantification of OLIG2<sup>+</sup> and GFAP<sup>+</sup> cells among DAPI<sup>+</sup> cells (mean  $\pm$  SEM, n = 3 fetal human samples, \*p < 0.05, one-way ANOVA, Dunnett's multiple comparisons post-test vs. control). **c,** Proliferation of OLIG2<sup>+</sup> cells was assessed following terminal 8-hr EdU incorporation at 24 hours of BMP treatment. BMP4 (50 ng/ml) treatment caused a significant decrease in OLIG2<sup>+</sup> cell proliferation relative to controls (paired t-test, p < 0.05, n = 3 fetal human samples). Scale: 50  $\mu$ m.

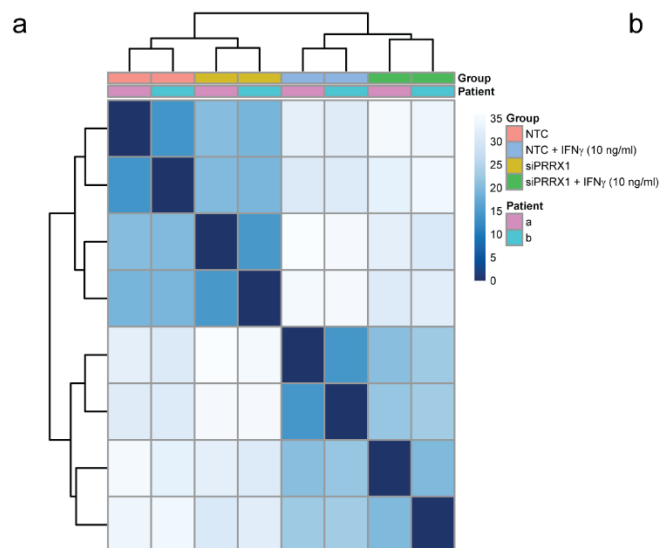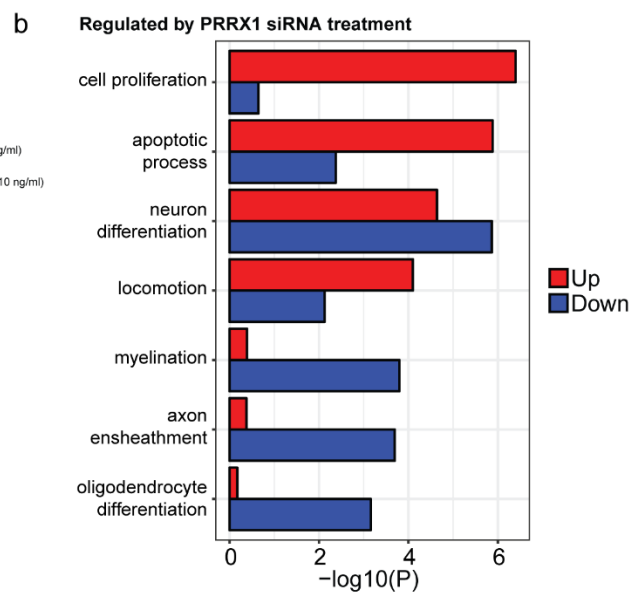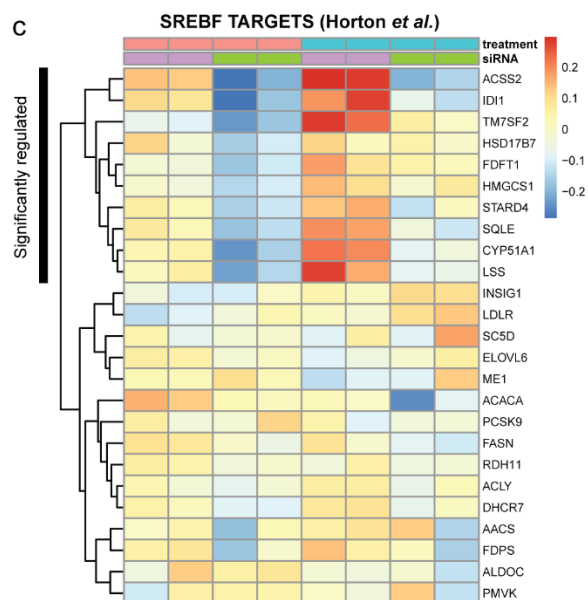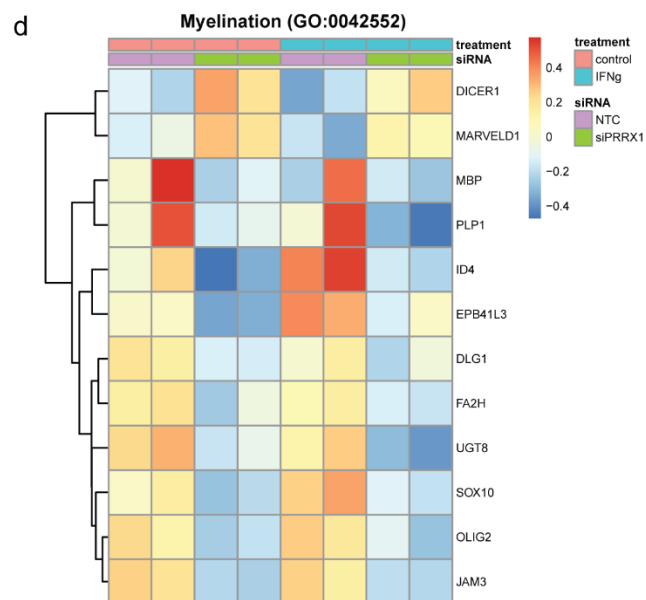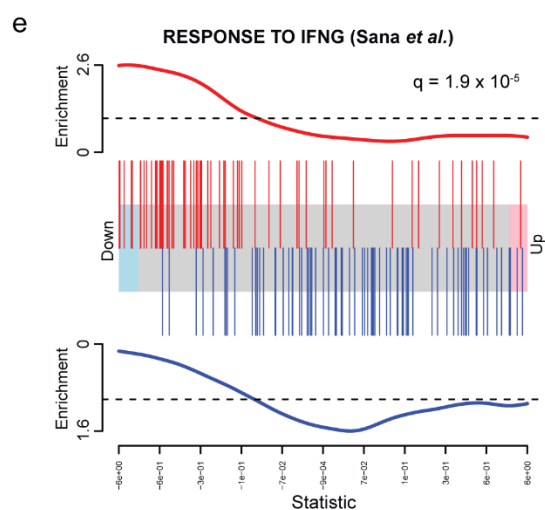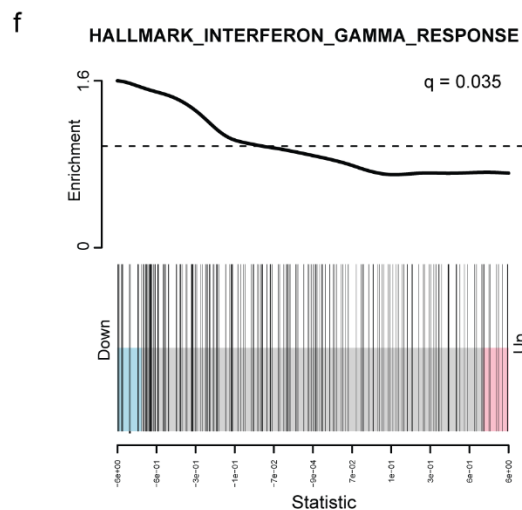

**Figure S7 (related to Figure 6). PRRX1 siRNA reduces cholesterol biosynthesis and reverses IFN- $\gamma$  induced gene expression.** Human hOPCs were treated with IFN- $\gamma$  (10 ng/ml) at 8 hrs post transfection and RNA extracted 24hrs later. **a**, Heatmap demonstrating clustering of individual RNA samples by sample-to-sample distances. The effects of IFN- $\gamma$  and PRRX1 siRNA treatment on hOPC transcriptome are clearly distinguishable. **b**, Gene Ontology-based over-representation analysis of genes regulated by PRRX1 siRNA in hOPCs. **c-d**, Pathway analysis by gene set enrichment and topGO revealed PRRX1 target gene regulation of cholesterol biosynthesis genes (**c**, *camera*  $q = 0.0059$ ) and myelination-associated transcripts (**d**, *topGO*  $p = 1.6 \times 10^{-4}$ ). **e-f**, Gene set enrichment analysis examining the effect of PRRX1 siRNA on the IFN- $\gamma$  induced transcriptional response demonstrated that PRRX1 siRNA was able to attenuate the induction of IFN-related transcripts. Red bars indicate the position of up-regulated genes and blue bars down-regulated genes in each gene set. The red/blue traces *above/below* show relative enrichment of up and down-regulated genes respectively (q-value shown).

**Supplemental Tables**

| <b>Gene / Target sequence</b> | <b>Sequence (5' to 3')</b>                                   |
|-------------------------------|--------------------------------------------------------------|
| PRRX1a                        | Fwd: CGCAGGAATGAGAGAGCCAT<br>Rev: AACATCTTGGGAGGGACGAG       |
| PRRX1b                        | Fwd: ACGCTTCCCTCCTCAAATCC<br>Rev: AGTAGCCATGGCGCTGTACG       |
| CCNA1                         | Fwd: TTCCCGCAATCATGTACCCTG<br>Rev: TGTAGCCAGCACAACTCCACT     |
| CCNB1                         | Fwd: CGCCTGAGCCTATTTTGGTTG<br>Rev: AGTGACTTCCCGACCCAGTA      |
| CCNE2                         | Fwd: TCTTCACTGCAAGCACCATC<br>Rev: ACCTCATTATTCATTGCTTCCAA    |
| SGOL1                         | Fwd: GACCCCAATAGTGATGACAGC<br>Rev: GAAATGATTCTCCTTGTCTGG     |
| RRM2                          | Fwd: CGGAGCCGAAAATAAGCAG<br>Rev: TCTCCTCGGGTTTCAGGGAT        |
| ANLN                          | Fwd: GCTGCGTAGCTTACAGACTTAGC<br>Rev: AAGGCGTTTAAAGGTGATAGGTG |
| IRF1                          | Fwd: CAACATGCCCATCACTCGGA<br>Rev: TGCTTTGTATCGGCCTGTGT       |

**Table S1 (related to Figures 5 & 6).** qPCR primers and Taqman assays used in this study.
